# Supplementary material for: Analysis of gene repair tracts from Cas9/gRNA double-stranded breaks in the human CFTR gene
Source: PubMed Central journal article supplement (PMC4997560; doi:10.1038/srep32230), 2016-08-25
Supplement: srep32230-s1.pdf [file srep32230-s1.pdf]

**Analysis of gene repair tracts from Cas9/gRNA double-stranded breaks in the human CFTR gene**

Jennifer A Hollywood, Ciaran M Lee, Martina F Scallan and Patrick T Harrison

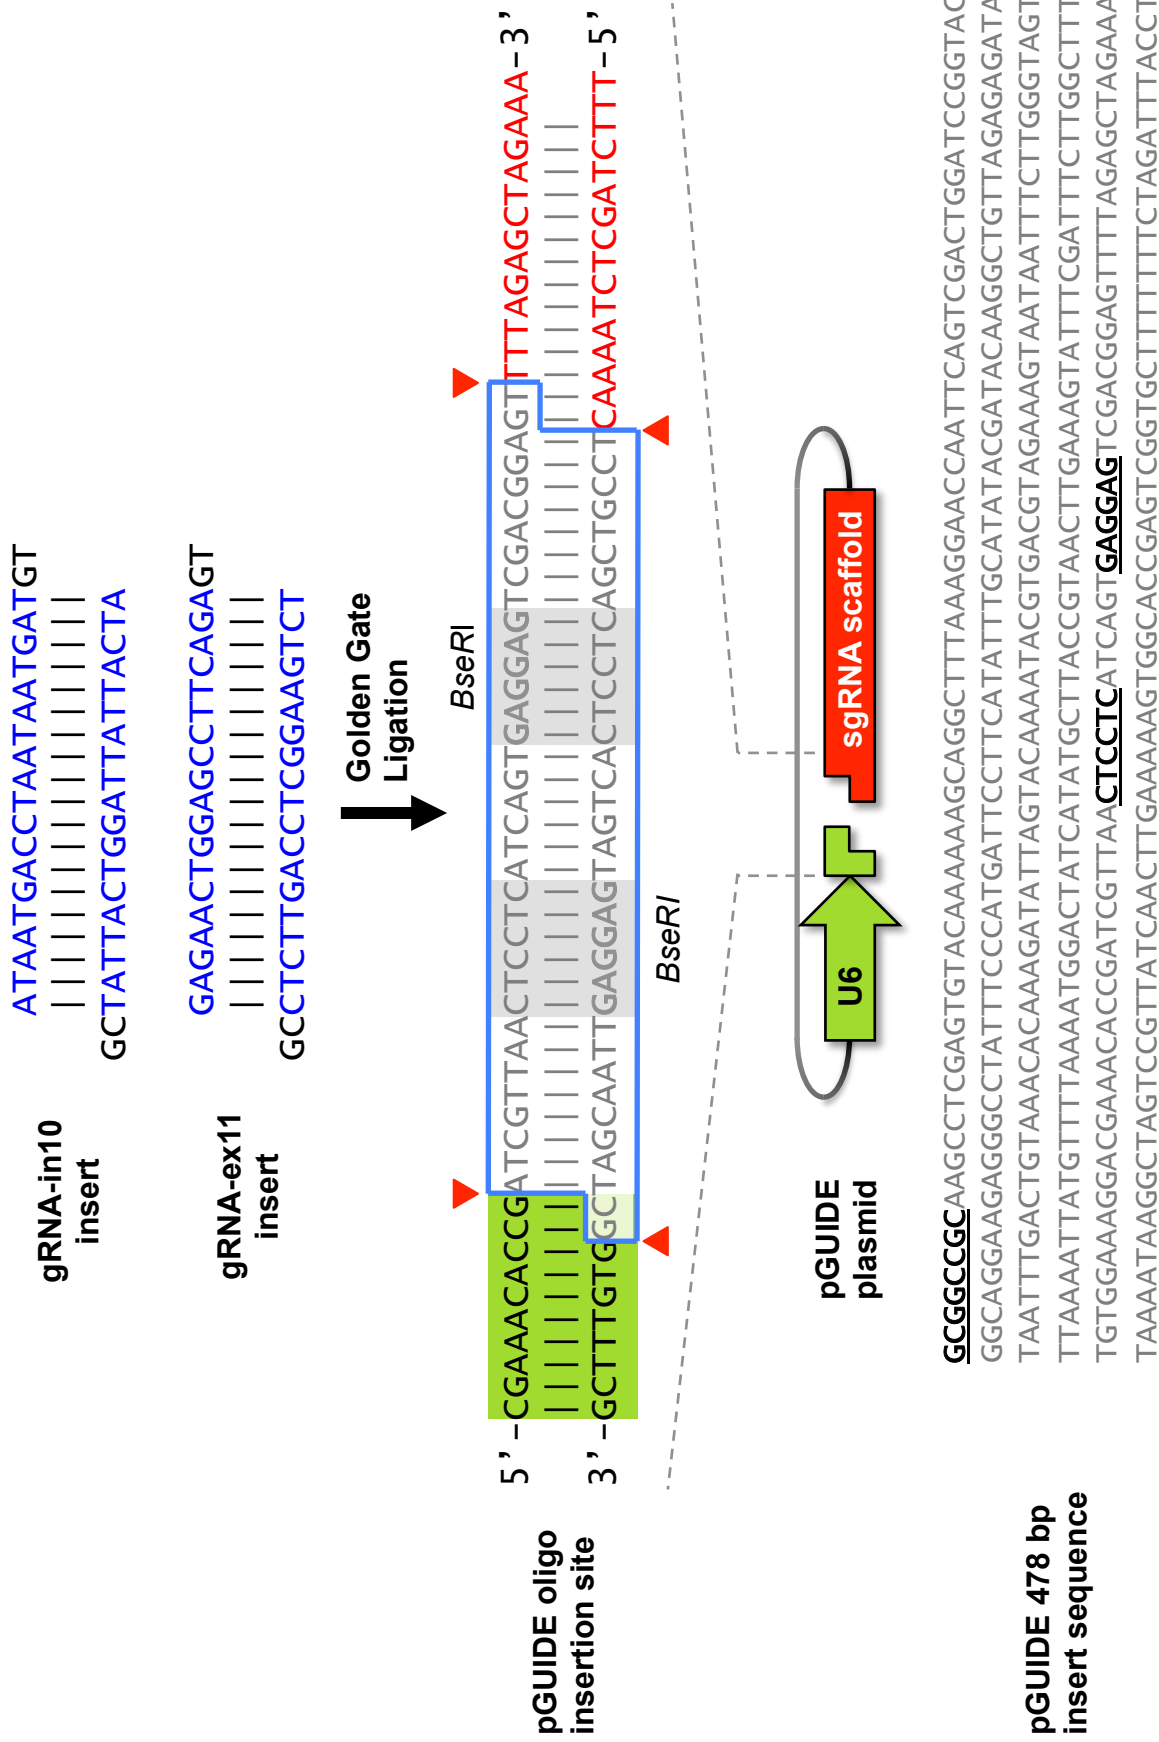

**Figure S1.** Oligonucleotide pairs used to encode gRNAs, and schematic representation of cloning into plasmid which contains sgRNA scaffold (pGUIDE). The upper oligonucleotide sequence in blue in each pair corresponds to the 19 bp sequence preceding 5'-NGG in genomic DNA. Sequences in black represents overhangs for ligation into the pair of *Bse*RI sites in pGUIDE. Golden gate cloning into the *Bse*RI sites enables direct insertion of annealed oligos in the correct orientation with the U6 promoter and ensures a G-C basepair for efficient U6 transcription. Lower panel shows the 478bp DNA sequence of the insert with the *Not*I sites and *Bse*RI sites underlined.



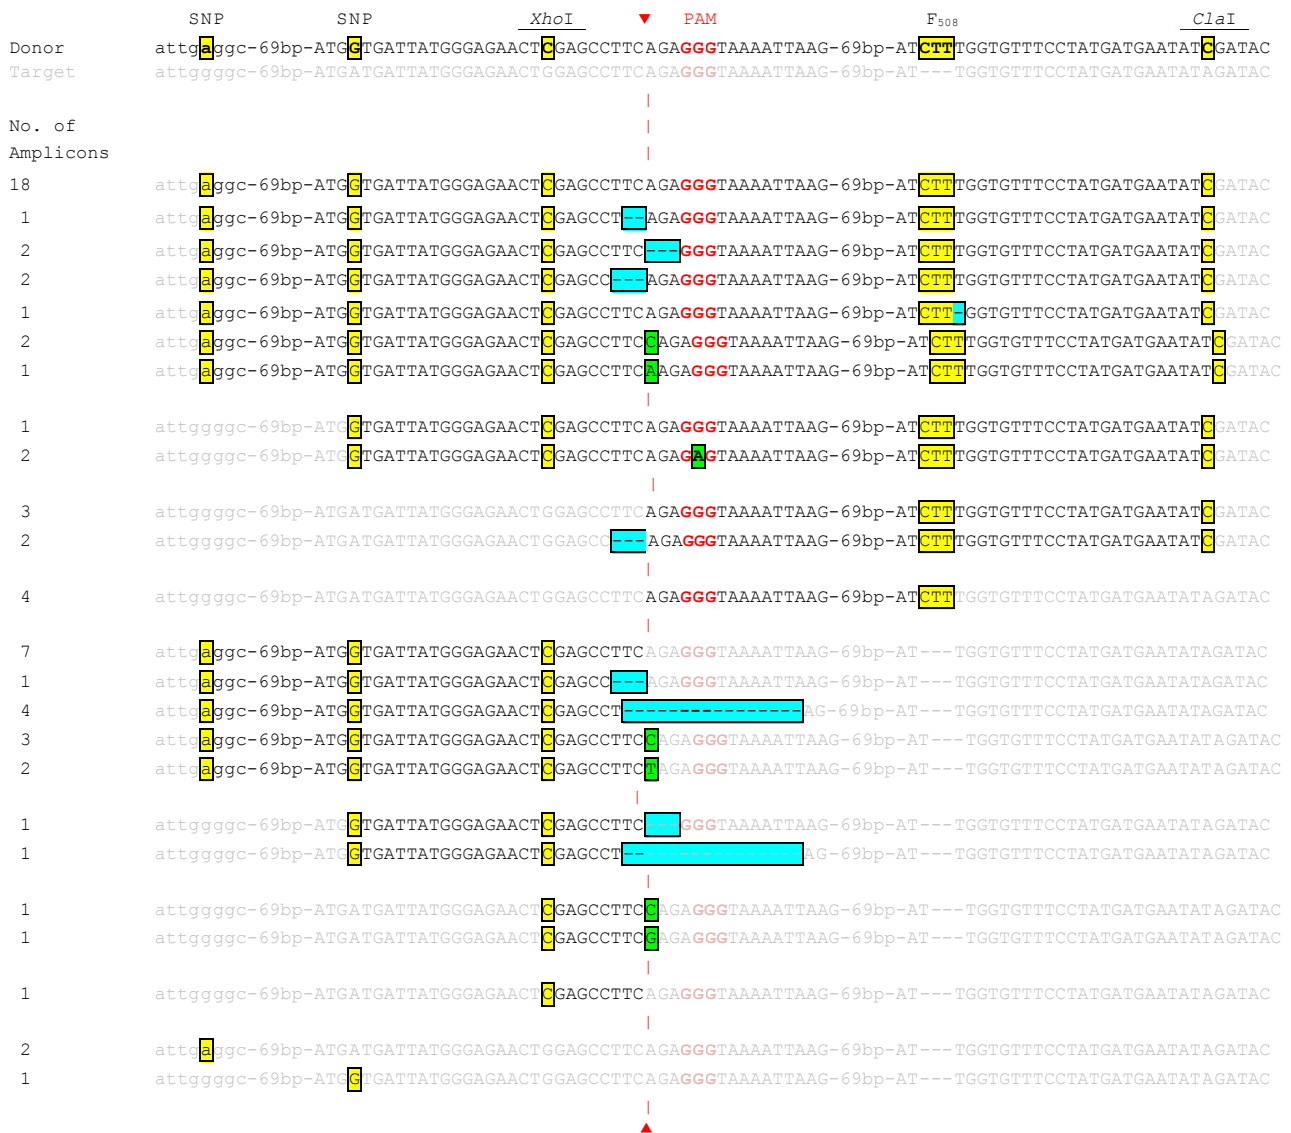

**Figure S3.** Sequence alignments of selected amplicons from Cas9/gRNA-ex11/donor-treated cells arranged in same order as Figure 2. Residues boxed in yellow are sequence differences in donor which are incorporated into the genome by HDR. Residues boxed in green and blue are insertions and deletions due to NHEJ repair respectively. Two 69bp regions, one either side of the gRNA target site, are identical to target sequence in all amplicons and omitted for clarity.
